# Supplementary material for: 12-Lipoxygenase inhibition delays onset of autoimmune diabetes in human gene replacement mice
Source: JCI journal article supplement (doi:10.1172/jci.insight.185299), 2024-11-12
Supplement: sd1 [file 1]

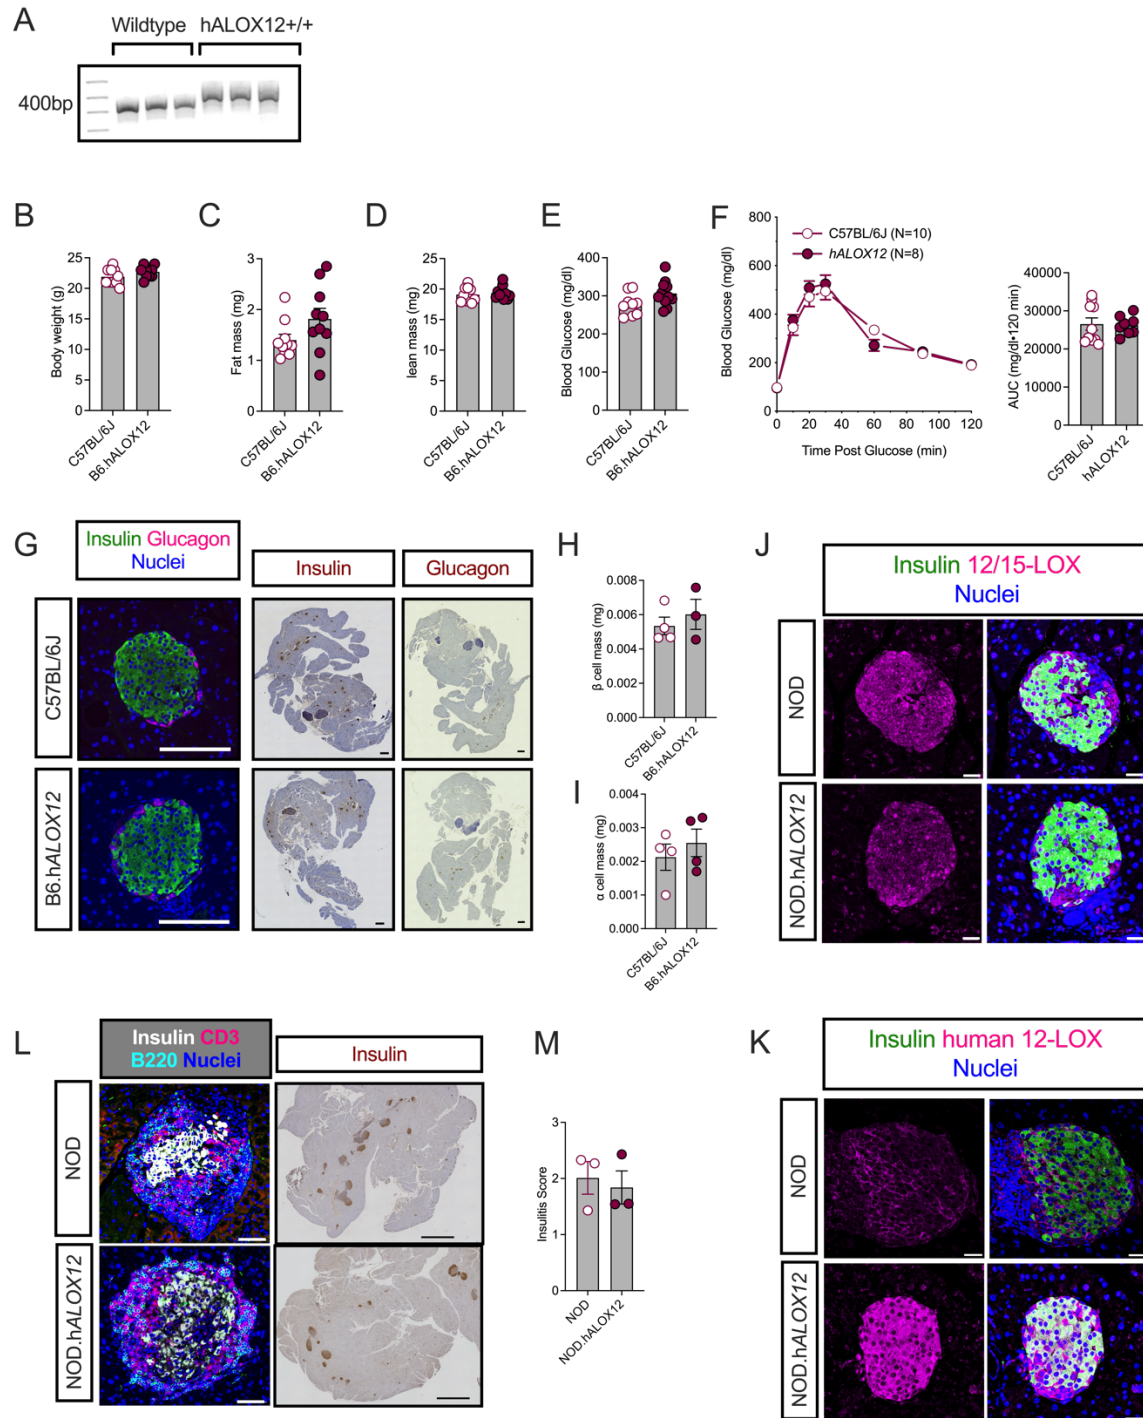

**Supplemental Figure 1: Comparison of *B6.hALOX12* to *C57BL/6J* mice and *NOD.hALOX12* to *NOD.ShiltJ* mice at 10 weeks of age. (A) Genotyping results of *B6.hALOX12* mice. (B) Body weight. (C) Fat mass. (D) Lean mass. (E) Random-fed blood glucose. (F) IPGTT and AUC (right panel) of 8 week old male *B6.hALOX12* mice (N=8) compared to *C57BL/6J* mice (N=10). (G) Pancreata from the mice indicated stained for glucagon (magenta), insulin (green) and nuclei (blue) (left panels); insulin (brown, middle panels); or glucagon (brown, right panels). Scale bars = 50  $\mu$ m. (H)  $\beta$  cell mass, each dot**

represents an individual mouse. **(I)**  $\alpha$  cell mass, each dot represents an individual mouse. **(J)** Pancreata from female *NOD* and *NOD.hALOX12* mice stained for 12/15-LOX (magenta), insulin (green), and nuclei (blue) (left panels). Scale bars = 20  $\mu$ m. **(K)** Pancreata from female *NOD* and *NOD.hALOX12* mice stained for 12-LOX (magenta), insulin (green), and nuclei (blue) (left panels). Scale bars = 20  $\mu$ m. **(L)** Pancreata from female *NOD* and *NOD.hALOX12* mice stained for CD3 (magenta), B220 (teal), insulin (white), and nuclei (blue) (left panels) or insulin (brown, right panels). Scale bars = 50  $\mu$ m. **(M)** Insulinitis score, each dot represents data from an individual mouse. Data are presented as mean  $\pm$ SEM and statistical significance was determined by a two-tailed T-test.

### A Insulitic Area

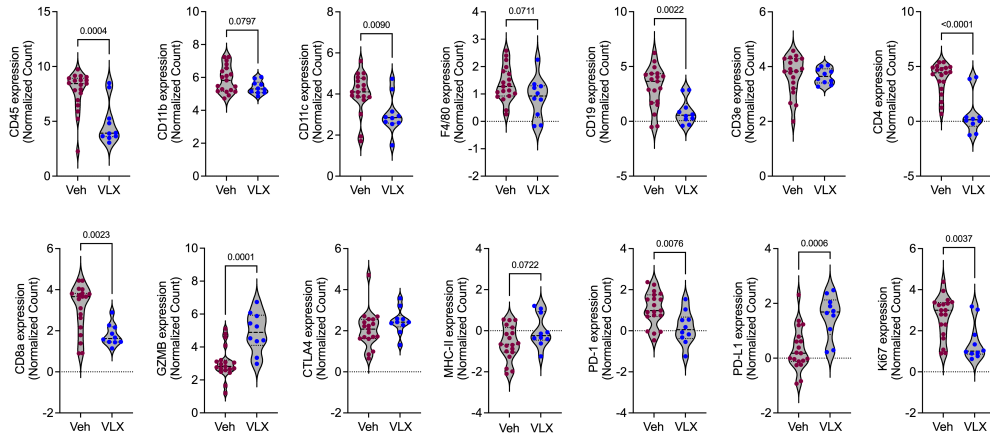

### B Islet Area

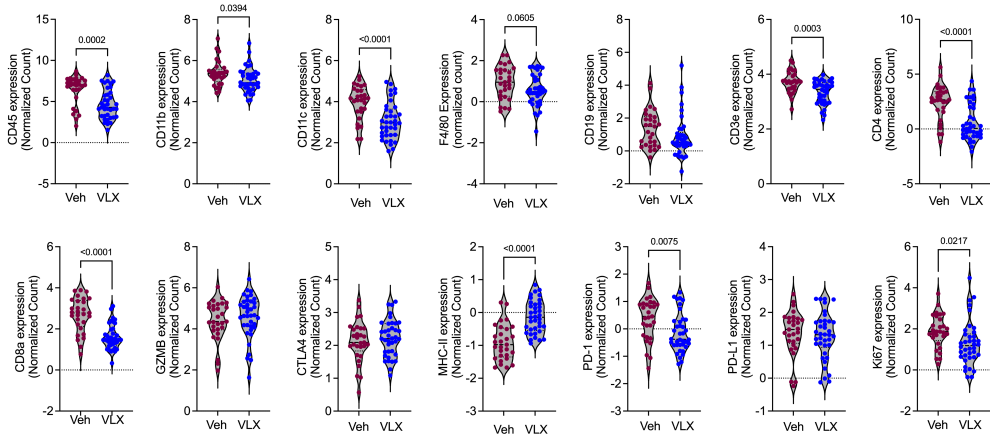

### C Pancreatic Lymph Nodes

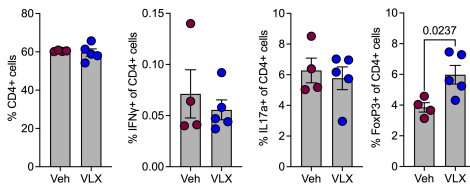

### D Spleen

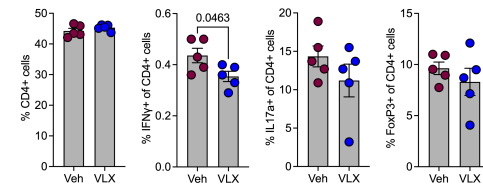

**Supplemental Figure 2: Spatial proteomics analysis and flow cytometry analysis of *NOD.hALOX12* mice treated with vehicle or VLX-1005.** Female *NOD.hALOX12* mice were treated for 4 weeks with either vehicle or VLX-1005. Nanostring® spatial proteomics were performed in the pancreas in regions of interest that included the peri-islet insulitic area (A) or the intra-islet area (B) for the indicated markers. Each dot represents a different region of interest. Pancreatic lymph nodes (C) or spleen (D) were isolated from treated mice and subjected to flow cytometry for the indicated markers. Each dot represents data from a single mouse. Data are presented as mean  $\pm$  SEM and statistical analysis was performed using a two-tailed T-test.

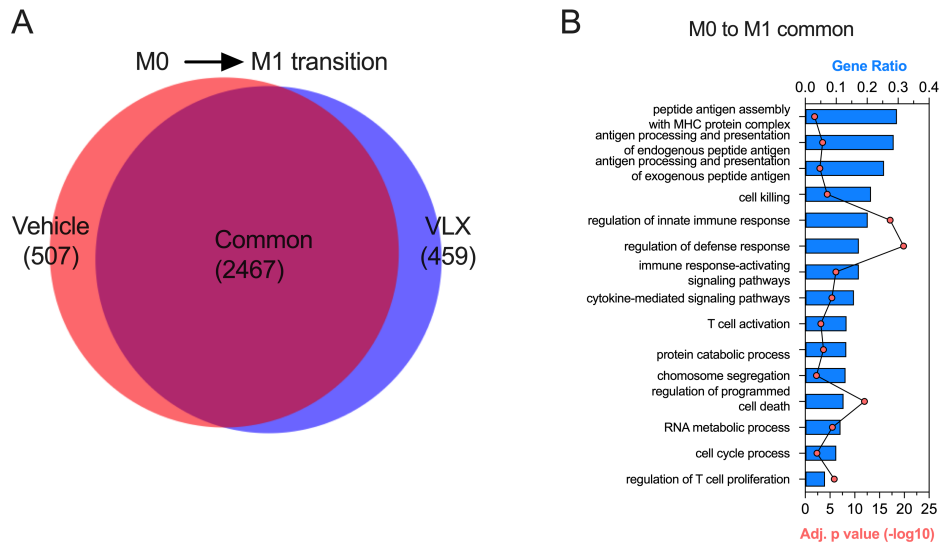

**Supplemental Figure 3: RNA-sequencing analysis of M1-like bone marrow derived macrophages.** Bone marrow-derived macrophage (BMDMs) were isolated and polarized to the M1-like state and treated with vehicle or VLX-1005 (10  $\mu$ M) during polarization. RNA was isolated and sequenced. **(A)** Differential gene expression identified between vehicle- and VLX-1005-treated macrophages during the M0 to M1 transition phase. **(B)** Gene ontology pathway analysis of the common differentially expressed genes.

**Supplemental Table 2: Lipidomics results of non-12-lipoxygenase products from serum of mice treated with vehicle or VLX-1005 for 1 weeks.** Data are presented as mean  $\pm$ SEM and statistical analysis was performed using a two-tailed T-test.

|                       | Vehicle          | 30 mg/kg VLX-1005 SDD | p-value |
|-----------------------|------------------|-----------------------|---------|
| <b>5-HETE</b>         | 96.1 $\pm$ 35.3  | 16.0 $\pm$ 2.5        | 0.053   |
| <b>11(12)-EET</b>     | 18.1 $\pm$ 8.1   | 2.2 $\pm$ 0.4         | 0.083   |
| <b>14,15-DHET</b>     | 12.6 $\pm$ 4.4   | 5.4 $\pm$ 0.7         | 0.141   |
| <b>11,12-DHET</b>     | 6.4 $\pm$ 2.3    | 4.0 $\pm$ 0.5         | 0.350   |
| <b>14(15)-EET</b>     | 16.1 $\pm$ 7.8   | 3.6 $\pm$ 0.6         | 0.110   |
| <b>8(9)-EET</b>       | 24.8 $\pm$ 11.1  | 3.8 $\pm$ 1.0         | 0.096   |
| <b>5(6)-EET</b>       | 140.7 $\pm$ 55.3 | 24.2 $\pm$ 5.3        | 0.070   |
| <b>18-HETE</b>        | 3.0 $\pm$ 1.5    | 1.7 $\pm$ 0.4         | 0.433   |
| <b>TX-B2</b>          | 12.4 $\pm$ 2.7   | 5.5 $\pm$ 2.2         | 0.086   |
| <b>6-keto-PGF1a</b>   | 39.2 $\pm$ 11.8  | 1.1 $\pm$ 0.6         | 0.012   |
| <b>Leukotriene-B4</b> | 1.5 $\pm$ 0.7    | 0.1 $\pm$ 0.1         | 0.080   |
| <b>5-oxo-EETE</b>     | 12.2 $\pm$ 3.7   | 3.9 $\pm$ 0.8         | 0.058   |
| <b>13-HDHA</b>        | 19.1 $\pm$ 7.0   | 3.4 $\pm$ 0.9         | 0.056   |
